# Supplementary material for: Dioxins levels in human blood after implementation of measures against dioxin exposure in Japan
Source: PubMed Central journal article supplement (PMC6329082; doi:10.1186/s12199-018-0755-7), 2019-01-10

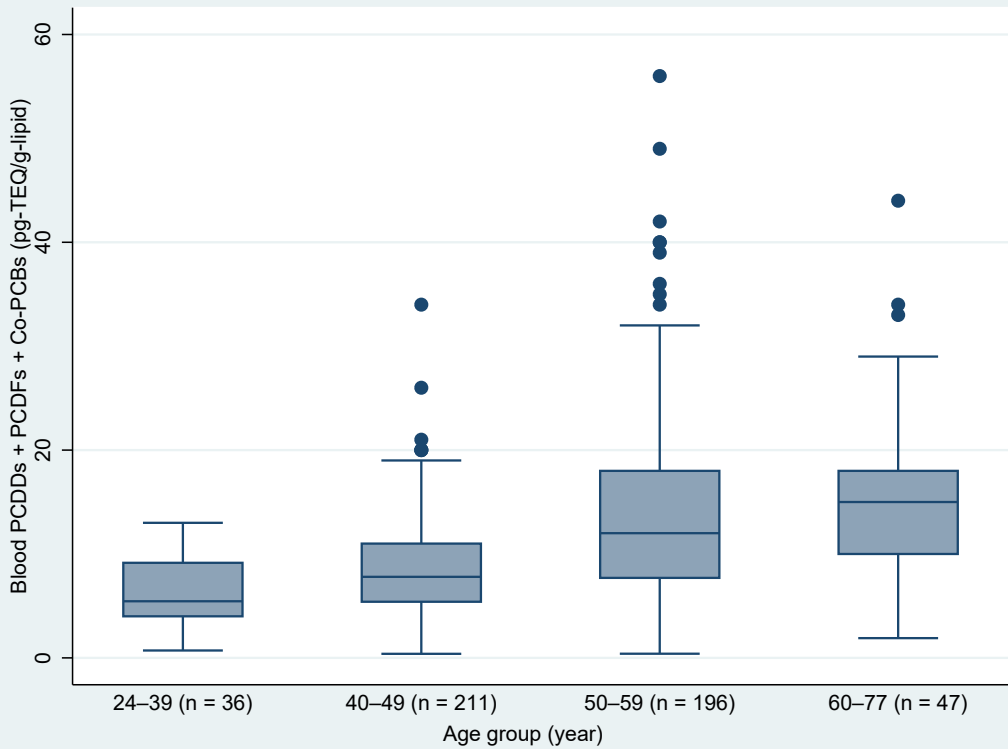

Supplement: 12199_2018_755_MOESM2_ESM.pdf [file 12199_2018_755_MOESM2_ESM.pdf]
